# Supplementary material for: Improving outcomes for primary school children at risk of cerebral visual impairments (the CVI project): study protocol for the process evaluation of a feasibility cluster-randomised controlled trial
Source: HighWire-hosted journal article supplement (doi:10.1136/bmjopen-2020-044856), 2021-05-01
Supplement: bmjopen-2020-044856supp001_data_supplement.pdf [file bmjopen-2020-044856supp001_data_supplement.pdf]

## Supplementary materials

### A. Teacher CVI knowledge assessment survey

|                                                               | 0          | 1 | 2 | 3 | 4 | 5 | 6 | 7 | 8 | 9 | 10           |
|---------------------------------------------------------------|------------|---|---|---|---|---|---|---|---|---|--------------|
| 1. I know everything about CVI                                | Not at all |   |   |   |   |   |   |   |   |   | Very much so |
| 2. I understand how complicated the cerebral visual system is | Not at all |   |   |   |   |   |   |   |   |   | Very much so |
| 3. I understand the impact of CVI in daily life               | Not at all |   |   |   |   |   |   |   |   |   | Very much so |
| 4. I can explain the impact of CVI in daily life to others.   | Not at all |   |   |   |   |   |   |   |   |   | Very much so |
| 5. I know how to adjust the environment of a child with CVI   | Not at all |   |   |   |   |   |   |   |   |   | Very much so |

### B. School staff Interview Topic Guides (Control and Intervention)

#### CONTROL SCHOOLS TOPIC GUIDE

##### Introduction

- Check participant is still happy to be involved with the research
- Explain recording device and confidentiality
- Explain purpose of the interview and that participant does not have to talk about anything they feel uncomfortable with and can stop at any time for any reason

##### Your role

##### Topics to include:

- Years in role
- Involvement with SEN
- Brief School ethos overall

##### Experiences with the CVI Project survey collection

##### Topics/questions to include:

- What was it that first interested you in the study?
- How has communication been with the study team? Anything that we could have done better or made it easier for you (as a member of staff?)
- What did you think about the research agreement process?
- Data collection-how did you feel about that?
- Were the questionnaires? acceptable? Interesting? Too long? Too short?
- Randomisation experiences and feelings
- Classroom photographs

##### Changes during study period

##### Topics to include:

- Changes to provision, SEN or other
- How are changes monitored and recorded?
- Are they related to the study or not?
- Changes to policy documents -where did those changes come from? And how does that impact on your practice
- Positive, negative or unintended consequences of trial participation

## INTERVENTION SCHOOLS TOPIC GUIDE

### Introduction

- Check participant is still happy to be involved with the research
- Explain recording device and confidentiality
- Explain purpose of the interview and that participant does not have to talk about anything they feel uncomfortable with and can stop at any time for any reason

### Your role

#### Topics to include:

- Years in role
- Involvement with SEN
- Brief School ethos overall

### Brief Survey Questions

1. **How was the training delivered?**
2. **Who delivered the training?**
3. **Which components of the intervention pack were used?**
4. **Who received the training? How many people in each group and in total?**
5. **How many referral letters sent out to parents if any so far?**
6. **How many students/children identified as would benefit from a referral so far?**

### Experiences with the CVI Project survey collection

#### Topics/questions to include:

- What was it that first interested you in the study?
- How has communication been with the study team? Anything that we could have done better or made it easier for you (as a member of staff?)
- What did you think about the research agreement process?
- Data collection-how did you feel about that?
- Were the questionnaires? acceptable? Interesting? Too long? Too short?
- Randomisation experiences and feelings
- Classroom photographs

### Changes during study period

#### Topics to include:

- **The intervention pack:** initial thoughts about the content and presentation?
- **Training provided,** scope, reach, whose responsibility was it?
- **The intervention**
  - Time and impact on teachers/school/yrs 3, 4 and 5 up to July 2020; yrs 4, 5 and 6 from September 2020
  - What was engagement like from staff?
  - Use in real life, which strategies were used and for who? How did that go?
  - Changes to provision, SEN or other
  - How were changes monitored and recorded?

- Referrals to eye service experiences, process, feedback, changes, would onsite assessments be better?
- Changes to policy documents -where did those changes come from? Any intention to change policy in future following intervention?
- Positive, negative or unintended consequences of trial participation
- Accessing specialist provision post-covid, how and source of provision/support

## C. Parent interview topic guide (Control and Intervention)

### Introduction

- Check participant is still happy to be involved with the research
- Explain recording device and confidentiality
- Explain purpose of the interview and that participant does not have to talk about anything they feel uncomfortable with and can stop at any time for any reason

### Your role

Topics to include:

- Describe your children
- Involvement with SEN – existing service use, referrals and stage of process.
- School ethos overall

### Experiences with the CVI Project survey collection

Topics to include:

- Data collection: paper forms, returning process, any problems?
- Surveys - acceptable? Interesting? Too long? Too short?
- Randomisation experiences and feelings
- Anything not clear or troubling in surveys?

### Interview part 2: Changes during study period

Topics to include:

- Control schools:
  - Changes to provision, SEN or other
  - Did you notice any changes in what is provided for your child at school?
  - Are they related to the study or not? eg classroom changes?
  - Did this impact on anything at home?
  - Positive, negative or unintended consequences of trial participation
- Intervention schools:
  - Changes to provision, SEN or other
  - Did you notice any changes in what is provided for your child at school?
  - Are they related to the study or not? eg classroom changes?
  - Did this impact on anything at home?
  - Positive, negative or unintended consequences of trial participation
  - Referrals to eye service experiences, process, feedback, changes, useful?

## D. Hospital eye-service staff interview topic guide

### Introduction

- Check participant is still happy to be involved with the research
- Explain recording device and confidentiality
- Explain purpose of the interview and that participant does not have to talk about anything they feel uncomfortable with and can stop at any time for any reason

### Your role

Topics to include:

- Years in role
- Involvement with SEN
- Involvement with CVI –previous experience of managing children with CVI

### Experiences with the CVI project referral process

Topics to include:

- How did the referral process from schools to eye unit work?
- Timing of referrals, accuracy, ability to book appointments
- Managing additional workload
- Scaling up of intervention if helpful - potential barriers/problems

### Experiences with the CVI Project data collection

Topics to include:

- Training to do the visual assessments, experiences and opinions
- Patient expectations for referrals, problems identified, any diagnoses?
- Anything you would change in the research data collection (the Looking Activities)?
- Data entry using REDCap, easy to use?

### Feedback to families and schools

Topics to include:

- Parent/carer reactions to appointments and feedback
- Any school responses or contact

### Overall experience

Topics to include:

- Positive, negative or unintended consequences of trial participation
